# Supplementary material
Source: ML conference proceedings conference paper supplement (https://proceedings.neurips.cc/paper_files/paper/2017/hash/d3a7f48c12e697d50c8a7ae7684644ef-Abstract.html)
Supplement: Supplementary file [file d3a7f48c12e697d50c8a7ae7684644ef-Supplemental.zip]

# Supplementary material for “Welfare Guarantees from Data”

## A Supplementary Figures

## B Omitted Proofs from Section 3

**Theorem 2 (restatement)** *For any auction  $A$  in a single dimensional setting and for any bid distribution  $\mathcal{D}$ , the distributional price of anarchy is bounded by  $\text{DPOA}(\mathcal{D}) \leq \frac{\mu(\mathcal{D})}{1-e^{-\mu(\mathcal{D})}}$ , where  $\mu(\mathcal{D}) = \frac{\max_{x \in \mathcal{X}} \sum_{i=1}^n T_i \cdot x_i}{\text{REV}(\mathcal{D})}$ .*

*Proof.* Our proof is based on a data-dependent analog of the value and revenue covering framework of [4]. First we show that even without having distributional knowledge, the threshold functions are related to the equilibrium utility of a bidder and any target utility at any Bayes-Nash equilibrium. Specifically, either the utility of a bidder at a Bayes-Nash is high compared to his value or the average threshold  $T_i$  is high.

**Lemma 8 (Value Covering).** *For any bidder  $i$  with value  $v_i$ , for any allocation amount  $x \in [0, 1]$  and for any  $\mu \geq 1$ ,*

$$u_i(v_i) + \frac{1}{\mu} T_i \cdot x_i \geq \frac{1 - e^{-\mu}}{\mu} v_i \cdot x_i. \quad (19)$$

where  $u_i(v_i) = u_i(\sigma_i(v_i); v_i)$ .

*Proof.* The proof proceeds analogously to the proof of value covering in [4]. For simplicity of notation we drop the subscript  $i$ , as we are focusing on a single agent and some threshold function  $\tau(\cdot)$ . Observe that since a player is at equilibrium it must be that for any target expected allocation  $z$  he does not want to deviate to a bid that corresponds to a price-per-unit  $\text{ppu}(b) = \tau(z)$ , which would yield him expected allocation at least  $z$ :

$$u(v) \geq z \cdot (v - \tau(z)) \implies \tau(z) \geq v - \frac{u(v)}{z} \quad (20)$$

Moreover, in any case  $\tau(z) \geq 0$ , by definition. Thus if we define  $\underline{\tau}(z) = \max(0, v - u(v)/z)$ , then we have  $\tau(z) \geq \underline{\tau}(z)$  and hence  $T \geq \underline{T} = \int_0^1 \underline{\tau}(z) dz$ .

Evaluating the integral gives  $\underline{T} = v - u(v) + u(v) \log \frac{u(v)}{v}$ . Thus

$$u(v) + \frac{1}{\mu} \underline{T} = u(v) + \frac{1}{\mu} \left( v - u(v) + u(v) \log \frac{u(v)}{v} \right)$$

and by dividing over by  $v$ :

$$\frac{u(v) + \frac{1}{\mu} \underline{T}}{v} = \frac{u(v)}{v} + \frac{1}{\mu} \left( 1 - \frac{u(v)}{v} + \frac{u(v)}{v} \log \frac{u(v)}{v} \right) \quad (21)$$

The right side of Equation (21) is convex in  $\frac{u(v)}{v}$ , so we can minimize it by taking first-order conditions of the quantity  $y + \frac{1}{\mu} (1 - y + y \log y)$  with respect to variable  $y$ , giving

$$0 = 1 + \frac{1}{\mu} \log y \implies y = e^{-\mu}.$$

Leading to a minimum value of that quantity of  $\frac{1-e^{-\mu}}{\mu}$ . Thus the right side of Equation (21) is at least this quantity, giving our desired result,

$$\frac{u(v) + \frac{1}{\mu} \underline{T}}{v} \geq \frac{1 - e^{-\mu}}{\mu}.$$

The Lemma follows by the fact that  $T \geq \underline{T}$  and  $x \in [0, 1]$ , which allows us to multiply and divide the fraction by  $x$  and then remove the  $x$  in front of the quantity  $u(v)$ .  $\square$

Given the value covering lemma we now proceed to proving the Theorem. Let  $\mathbf{X}^*(\mathbf{v})$  be the welfare optimal allocation rule for valuation profile  $\mathbf{v}$ , i.e. the one that solves the optimization problem  $\max_{x \in \mathcal{X}} \sum_{i=1}^n v_i \cdot x_i$ . Applying the value covering inequality of Equation (19) with respect to the optimal allocation quantity  $X_i^*(\mathbf{v})$  gives that for each bidder  $i$  with value  $v_i$ ,

$$u_i(v_i) + \frac{1}{\mu} T_i \cdot X_i^*(\mathbf{v}) \geq \frac{1 - e^{-\mu}}{\mu} v_i \cdot X_i^*(\mathbf{v}). \quad (22)$$

The quantity  $v_i \cdot X_i^*(\mathbf{v})$  is exactly agent  $i$ 's expected contribution to the welfare of the optimal auction. Moreover, by the definition of  $\mu(\mathcal{D})$ :

$$\mu(\mathcal{D}) \cdot \text{REV} \geq \max_{x \in \mathcal{X}} \sum_{i=1}^n T_i \cdot x_i \geq \mathbf{E}_{\mathbf{v}} \left[ \sum_i T_i \cdot X_i^*(\mathbf{v}) \right] \quad (23)$$

Let UTIL denote the expected equilibrium total utility of the bidders in the auction. By Equations (22) and (23) we obtain:

$$\begin{aligned} \text{UTIL} + \text{REV} &\geq \mathbf{E}_{\mathbf{v}} \left[ \sum_i u_i(v_i) \right] + \mathbf{E}_{\mathbf{v}} \left[ \sum_i \frac{1}{\mu(\mathcal{D})} T_i \cdot X_i^*(\mathbf{v}) \right] \\ &= \sum_i \mathbf{E}_{\mathbf{v}} \left[ u_i(v_i) + \frac{1}{\mu(\mathcal{D})} T_i \cdot X_i^*(\mathbf{v}) \right] \\ &\geq \sum_i \mathbf{E}_{\mathbf{v}} \left[ \frac{1 - e^{-\mu(\mathcal{D})}}{\mu(\mathcal{D})} v_i \cdot X_i^*(\mathbf{v}) \right] = \frac{1 - e^{-\mu(\mathcal{D})}}{\mu(\mathcal{D})} \text{OPT}(\mathbf{F}) \end{aligned}$$

Since  $\text{WELFARE}(\sigma; \mathbf{F}) = \text{UTIL} + \text{REV}$ , we have our desired result:

$$\text{WELFARE}(\sigma; \mathbf{F}) \geq \frac{1 - e^{-\mu(\mathcal{D})}}{\mu(\mathcal{D})} \text{OPT}(\mathbf{F}).$$

□

## C Omitted Proofs from Section 5

We begin by showing convergence of  $\hat{T}_i$  to  $T_i$  and  $\hat{\mathbf{T}}$  to  $\mathbf{T}$ .

**Lemma 9** (Bounding Estimated Average Thresholds). *Suppose that the premises of Lemma 5 hold and that the function  $p_i(x_i^{-1}(\cdot))$  is  $L$ -Lipschitz continuous. Then for each player  $i$  with probability  $1 - \delta$ :*

$$|\hat{T}_i - T_i| \leq \tilde{O} \left( \max\{L, H\} \sqrt{\frac{H \log(1/\delta)}{T}} \right) \quad (24)$$

*Proof.* Since we focus on a single player  $i$ , we drop index  $i$  and denote  $\tau(\cdot), p(\cdot), x(\cdot)$  for  $\tau_i(\cdot), p_i(\cdot), x_i(\cdot)$  and similarly for their estimated quantities. Recall that  $\tau(z) = \inf_{x(b) \geq z} \frac{p(b)}{x(b)}$  and  $\hat{\tau}(z) = \inf_{\hat{x}(b) \geq z} \frac{\hat{p}(b)}{\hat{x}(b)}$ . Moreover, we denote with  $\epsilon_x = \sup_{b \in \mathcal{B}} |\hat{x}(b) - x(b)|$  and  $\epsilon_p = \sup_{b \in \mathcal{B}} |\hat{p}(b) - p(b)|$ , the uniform errors on the payment and allocation curve, which be the assumptions of the theorem are upper bounded, with probability  $1 - \delta$ , by  $\tilde{O} \left( \sqrt{\frac{H \log(1/\delta)}{T}} \right)$ .

Our goal is to bound the quantity:

$$|\hat{T}_i - T_i| = \left| \int_0^1 (\hat{\tau}(z) - \tau(z)) dz \right| \leq \int_0^1 |\hat{\tau}(z) - \tau(z)| dz$$

By individual rationality we have that  $p(b) \leq Hx(b)$ . Thus we get that  $0 \leq \tau(z), \hat{\tau}(z) \leq H$  and therefore  $|\hat{\tau}(z) - \tau(z)| \leq H$ . Hence:

$$|\hat{T}_i - T_i| \leq \int_0^{2\epsilon_x} |\hat{\tau}(z) - \tau(z)| dz + \underbrace{\int_{2\epsilon_x}^1 |\hat{\tau}(z) - \tau(z)| dz}_A \leq 2H\epsilon_x + \underbrace{\int_{2\epsilon_x}^1 |\hat{\tau}(z) - \tau(z)| dz}_A$$

It remains to bound quantity  $A$ . We consider any  $z \in [2\epsilon_x, 1]$ . By the definition of  $\tau$  and  $\hat{\tau}$ , we obtain

$$\begin{aligned} |\hat{\tau}(z) - \tau(z)| &= \left| \inf_{\hat{x}(b) \geq z} \frac{\hat{p}(b)}{\hat{x}(b)} - \inf_{x(b) \geq z} \frac{p(b)}{x(b)} \right| \\ &\leq \underbrace{\left| \inf_{\hat{x}(b) \geq z} \frac{\hat{p}(b)}{\hat{x}(b)} - \inf_{\hat{x}(b) \geq z} \frac{p(b)}{x(b)} \right|}_C + \underbrace{\left| \inf_{\hat{x}(b) \geq z} \frac{p(b)}{x(b)} - \inf_{x(b) \geq z} \frac{p(b)}{x(b)} \right|}_D. \end{aligned}$$

We now upper bound separately the two terms  $C$  and  $D$ .

*Bounding  $C$ .* For term  $C$  we have:

$$\begin{aligned} C &\leq \sup_{\hat{x}(b) \geq z} \left| \frac{\hat{p}(b)}{\hat{x}(b)} - \frac{p(b)}{x(b)} \right| = \sup_{\hat{x}(b) \geq z} \frac{1}{\hat{x}(b)x(b)} \cdot |\hat{p}(b)x(b) - p(b) \cdot \hat{x}(b)| \\ &= \sup_{\hat{x}(b) \geq z} \frac{1}{\hat{x}(b)x(b)} \cdot |\hat{p}(b)x(b) - p(b)x(b) + p(b)x(b) - p(b) \cdot \hat{x}(b)| \\ &\leq \sup_{\hat{x}(b) \geq z} \frac{1}{\hat{x}(b)} \cdot |p(b) - \hat{p}(b)| + \sup_{\hat{x}(b) \geq z} \frac{p(b)}{\hat{x}(b)x(b)} \cdot |x(b) - \hat{x}(b)| \\ &\leq \frac{1}{z} \epsilon_p + \frac{1}{z} \sup_{\hat{x}(b) \geq z} \frac{p(b)}{x(b)} \cdot |x(b) - \hat{x}(b)| \end{aligned}$$

Since  $z \geq 2\epsilon_x$ , we have that for any  $b$ , with  $\hat{x}(b) \geq z$ , it must also be that:  $x(b) \geq \hat{x}(b) - \epsilon_x \geq z - \epsilon_x > 0$ , which implies that  $\frac{p(b)}{x(b)} \leq H$  (by individual rationality). Which leads to the bound:

$$C \leq \frac{1}{z} \epsilon_p + \frac{H}{z} \epsilon_x \quad (25)$$

*Bounding  $D$ .* For quantity  $D$ , we proceed as follows. Let  $Z = \{x(b) : x(b) \geq z\}$  and  $\hat{Z} = \{x(b) : \hat{x}(b) \geq z\}$  (note that in the second set, we still use  $x(b)$  to define the possible allocations, and only the set of bids is defined based on the estimated allocation function). Then:

$$D = \left| \inf_{\hat{x}(b) \geq z} \frac{p(b)}{x(b)} - \inf_{x(b) \geq z} \frac{p(b)}{x(b)} \right| = \left| \inf_{t \in \hat{Z}} \frac{p(x^{-1}(t))}{t} - \inf_{t \in Z} \frac{p(x^{-1}(t))}{t} \right|,$$

By the fact that the function  $p(x^{-1}(t))$  is  $L$ -Lipschitz, we can bound the derivative of the function  $Q(t) = \frac{p(x^{-1}(t))}{t}$  by:

$$|Q'(t)| = \left| \frac{(p(x^{-1}(t)))'}{t} - \frac{p(x^{-1}(t))}{t^2} \right| \leq 2 \max \left\{ \frac{L}{t}, \frac{p(x^{-1}(t))}{t^2} \right\}$$

Observe that  $p(x^{-1}(t))$  is the expected payment required to get an expected allocation of  $t$ . By individual rationality, for any  $t > 0$ , the latter is at most  $H \cdot t$ . Thus:

$$|Q'(t)| \leq \frac{2 \max\{L, H\}}{t} \quad (26)$$

Observe that for any  $t \in Z \cup \hat{Z}$ ,  $t \geq z - \epsilon_x \geq \frac{z}{2} > 0$ . Hence, the function  $Q(t)$  is  $\frac{4 \max\{L, H\}}{z}$ -Lipschitz in  $Z \cup \hat{Z}$ . Moreover, observe that for any  $\hat{t} \in \hat{Z}$ , there exists  $t \in Z$ :  $|t - \hat{t}| \leq \epsilon_x$ . Hence, the two infima in expression  $D$  can defer by at most:

$$D \leq \frac{4 \max\{L, H\}}{z} \epsilon_x \quad (27)$$

*Concluding.* Thus we can bound quantity  $A$  by:

$$A \leq \int_{2\epsilon_x}^1 \frac{\epsilon_p + 5 \max\{L, H\} \epsilon_x}{z} dz \leq \log \left( \frac{1}{2\epsilon_x} \right) (\epsilon_p + 5 \max\{L, H\} \epsilon_x)$$

Combining all the above, we conclude that:

$$|\hat{T}_i - T_i| \leq 2H\epsilon_x + \log\left(\frac{1}{2\epsilon_x}\right) (\epsilon_p + 5 \max\{L, H\}\epsilon_x) \quad (28)$$

Since with probability  $1 - \delta$ , both  $\epsilon_x$  and  $\epsilon_p$  are of  $\tilde{O}\left(\sqrt{\frac{H \log(1/\delta)}{T}}\right)$ , we get that with the same probability:

$$|\hat{T}_i - T_i| \leq \tilde{O}\left(\max\{L, H\}\sqrt{\frac{H \log(1/\delta)}{T}}\right) \quad (29)$$

since the quantity  $\log(1/\epsilon_x)$ , can only introduce  $\log(T)$  factors in the RHS of Equation (28).  $\square$

**Lemma 10** (Bounding Estimated Optimal Threshold Quantity). *Let  $\hat{\mathbf{T}} = \max_{x \in \mathcal{X}} \sum_{i=1}^n \hat{T}_i \cdot x_i$ . Then with probability  $1 - \delta$ :*

$$|\hat{\mathbf{T}} - \mathbf{T}| \leq \tilde{O}\left(n \max\{L, H\}\sqrt{\frac{H \log(n/\delta)}{T}}\right) \quad (30)$$

*Proof.* By Lemma 9 and a union bound across players, we have that with probability  $1 - \delta$ :

$$\sup_{i \in [n]} |\hat{T}_i - T_i| \leq \tilde{O}\left(\max\{L, H\}\sqrt{\frac{H \log(n/\delta)}{T}}\right) \quad (31)$$

Moreover, for any allocation  $x \in \mathcal{X}$ :

$$\left|\sum_i (\hat{T}_i - T_i)x_i\right| \leq \sum_i |\hat{T}_i - T_i| \leq \tilde{O}\left(n \max\{L, H\}\sqrt{\frac{H \log(n/\delta)}{T}}\right) \quad (32)$$

Thus we can bound the error in  $\mathbf{T}$  as:

$$\begin{aligned} |\hat{\mathbf{T}} - \mathbf{T}| &= \left| \max_{x \in \mathcal{X}} \sum_i (\hat{T}_i \cdot x_i) - \max_{x \in \mathcal{X}} \sum_{i \in [n]} T_i x_i \right| \leq \sup_{x \in \mathcal{X}} \left| \sum_i (\hat{T}_i - T_i)x_i \right| \\ &\leq \tilde{O}\left(n \max\{L, H\}\sqrt{\frac{H \log(n/\delta)}{T}}\right) \end{aligned}$$

The latter concludes the proof of the theorem.  $\square$

We are now ready to show our main estimation theorem.

**Theorem 7 (Restatement).** *Under Assumption 6 and the premises of Lemma 5, with probability  $1 - \delta$ :*

$$\frac{\text{OPT}(\mathbf{F})}{\text{WELFARE}(\sigma; \mathbf{F})} \leq \frac{\hat{\mu}}{1 - e^{-\hat{\mu}}} + \tilde{O}\left(n \max\{L, H\}\sqrt{\frac{H \log(n/\delta)}{T}}\right) \quad (33)$$

*Proof.* First note that  $\widehat{\text{REV}} = \frac{1}{T} \sum_{t=1}^T \mathbf{b}^{i:tT}$ . Thus, using standard Hoeffding's inequality we obtain that

$$P\left(\left|\widehat{\text{REV}} - \text{REV}\right| > \tau\right) \leq 2e^{-\frac{2\tau^2 T}{(nH)^2}}.$$

Thus with probability at least  $1 - \delta/2$

$$\left|\widehat{\text{REV}} - \text{REV}\right| \leq nH \sqrt{\frac{\log(4/\delta)}{2T}}.$$

Combining this result with the result of Lemma 10, we find that with probability at least  $1 - \delta$

$$|\hat{\mu} - \mu| \leq \tilde{O}\left(n \max\{L, H\}\sqrt{\frac{H \log(n/\delta)}{T}}\right).$$

Let  $\hat{\rho} = \hat{\mu} (1 - e^{-\hat{\mu}})^{-1}$ . Since the function  $f(x) = x/(1 - e^{-x})$  is Lipschitz we can conclude that

$$|\hat{\rho} - \rho| \leq \tilde{O} \left( n \max\{L, H\} \sqrt{\frac{H \log(n/\delta)}{T}} \right)$$

with probability at least  $1 - \delta$

□
